# Supplementary figures and images for: Phosphorous acid route synthesis of iron tavorite phases, LiFePO4(OH)xF1−x [0 ≤ x ≤ 1] and comparative study of their electrochemical activities
Source: Royal Society of Chemistry journal article supplement (doi:10.1039/c4ra05391e), 2014-01-01

Supplemental information

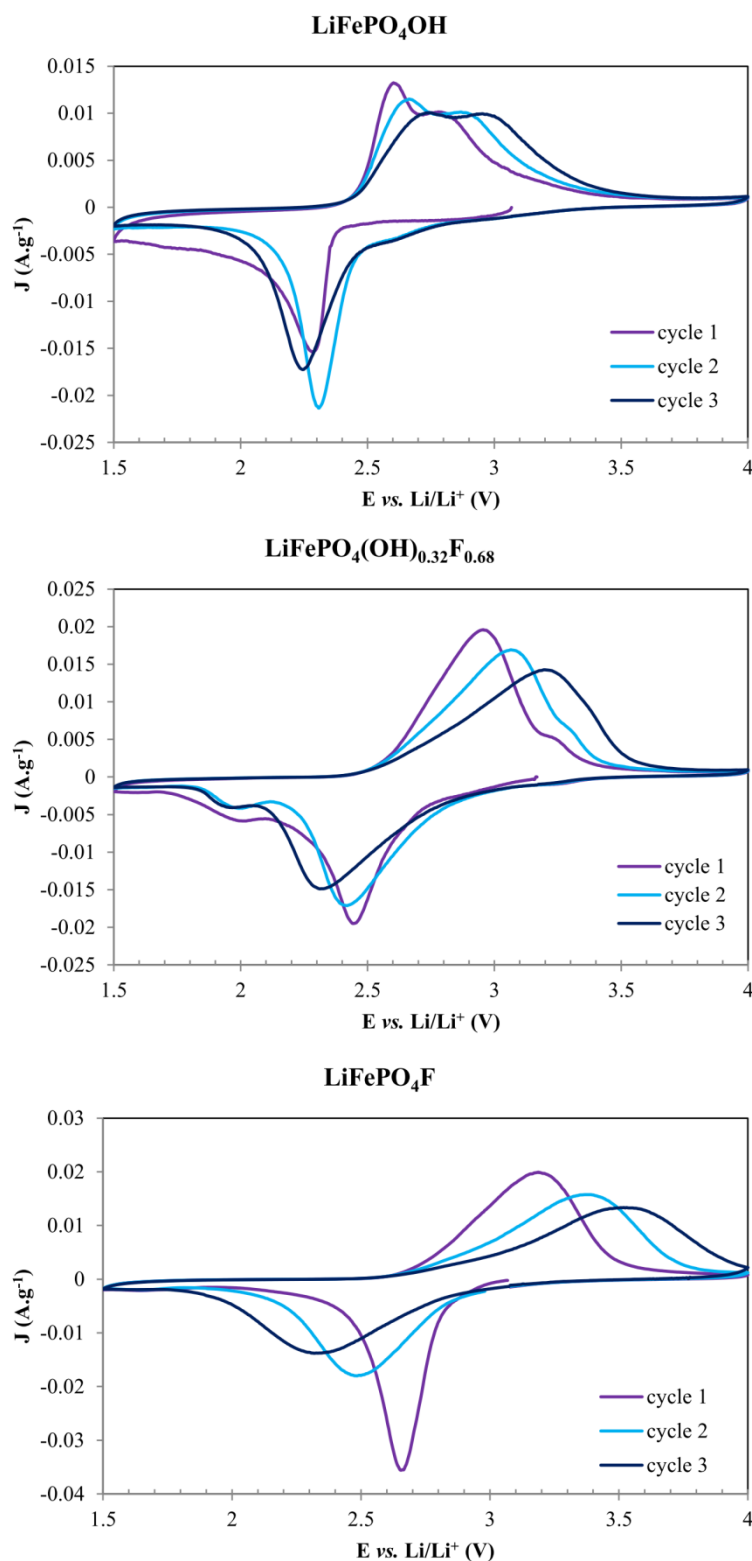

Figure S1. First 3 cycles of CV for the three iron tavorite phases.

Supplement: c4ra05391e2.pdf [file c4ra05391e2.pdf]
